# Supplementary material
Source: publisher figshare collection journal article supplement (https://karger.figshare.com/articles/dataset/_/4781053)
Supplement: Supplementary file 1 [file 1]

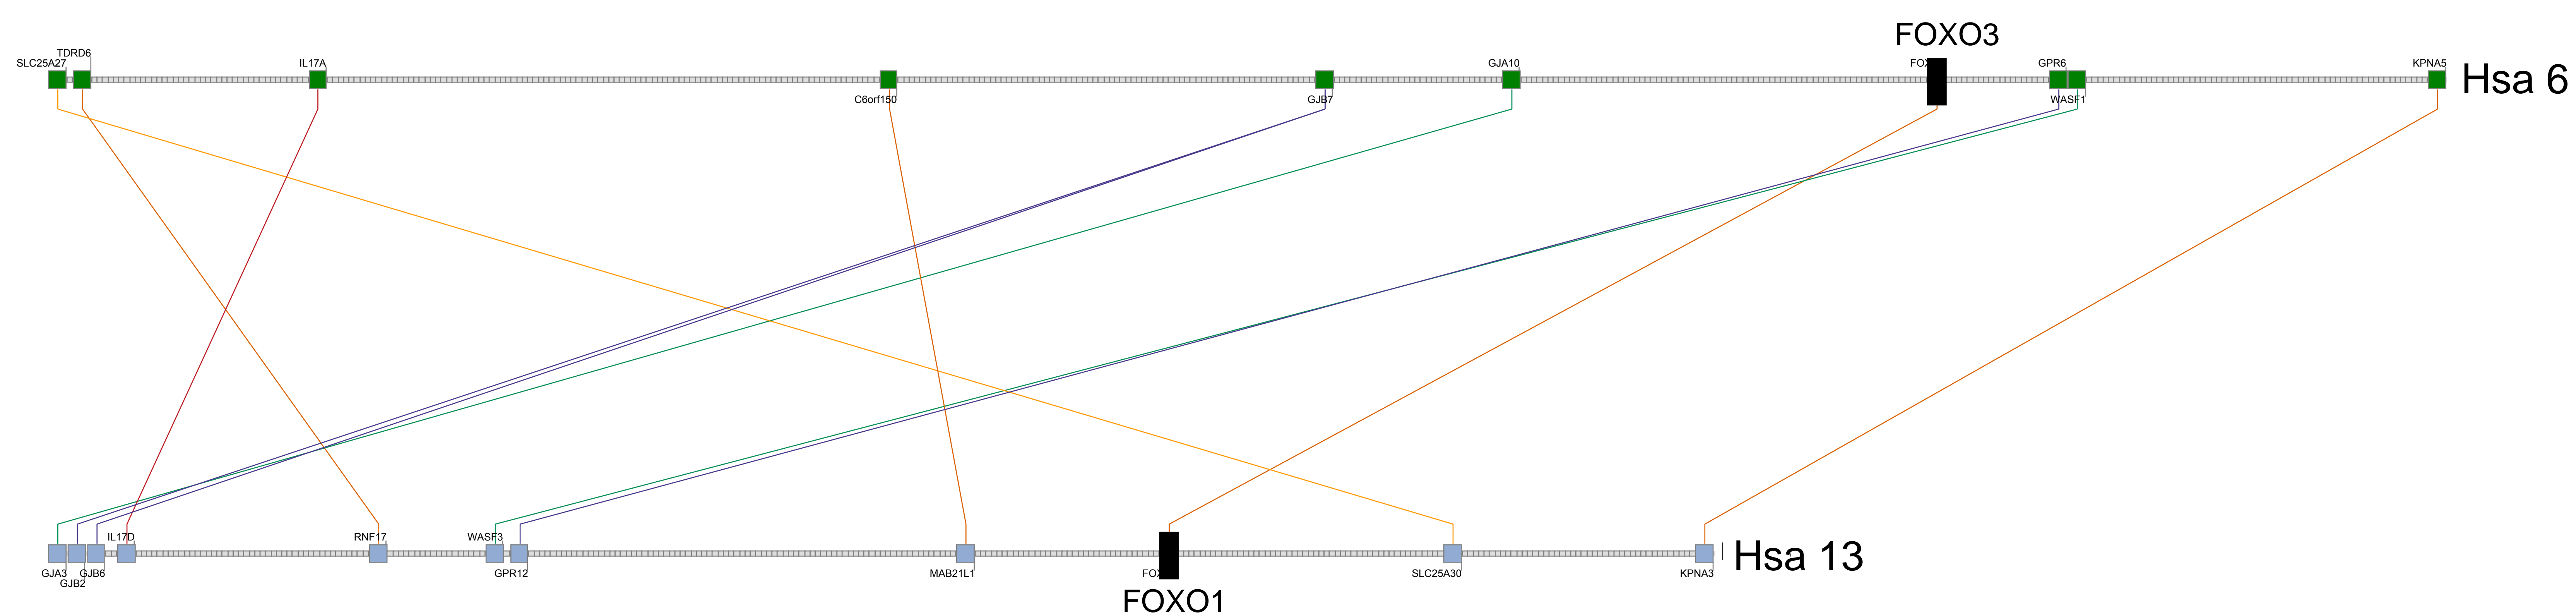

Supplemental Fig.5. Analysis of the FOXO1/3 paralogy in human genome. The FOXO1 and FOXO3 paralogous syntenic cluster in humans is characterized by ten pairs of genes with FOXO1 and FOXO3 serving as the pivot (50-gene sliding window).
