# Supplementary material
Source: publisher figshare collection journal article supplement (https://karger.figshare.com/articles/dataset/_/4781053)

Supplemental Fig.4. Synteny analyses of partial of fox genes were performed using The Synteny Database (Catchen et al. 2009) from mouse and medaka. Generally, 30 Mb around the mouse FOX genes were taken into account (50-gene sliding window). The orthologs location was marked by black bar.

FoxD1

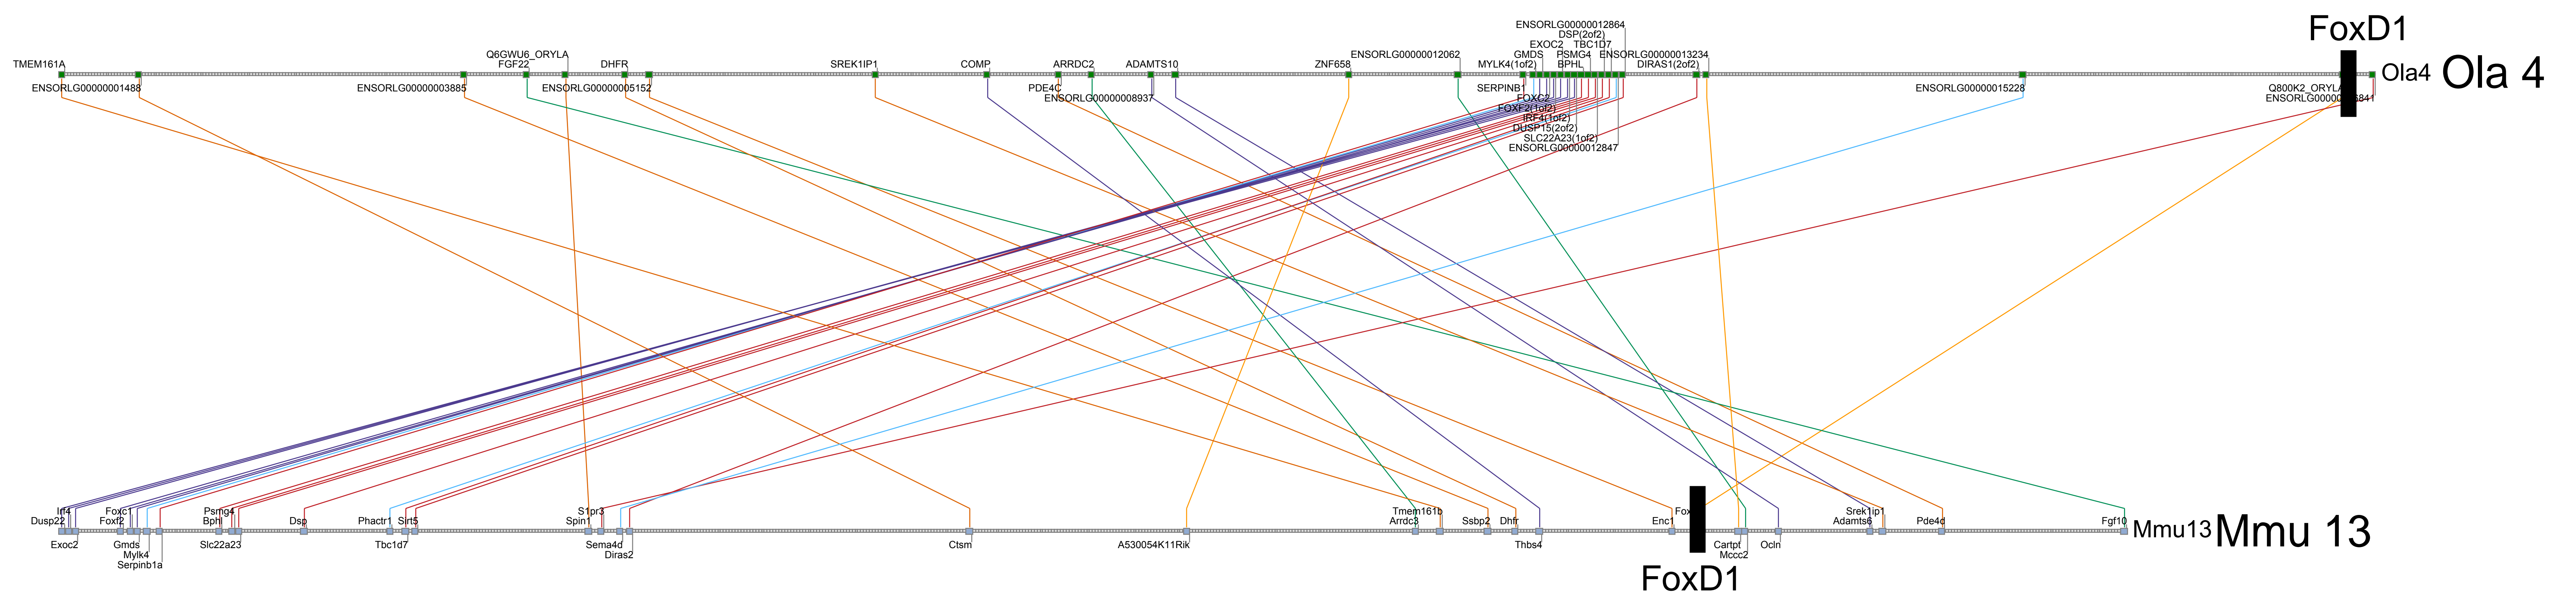

FoxF1

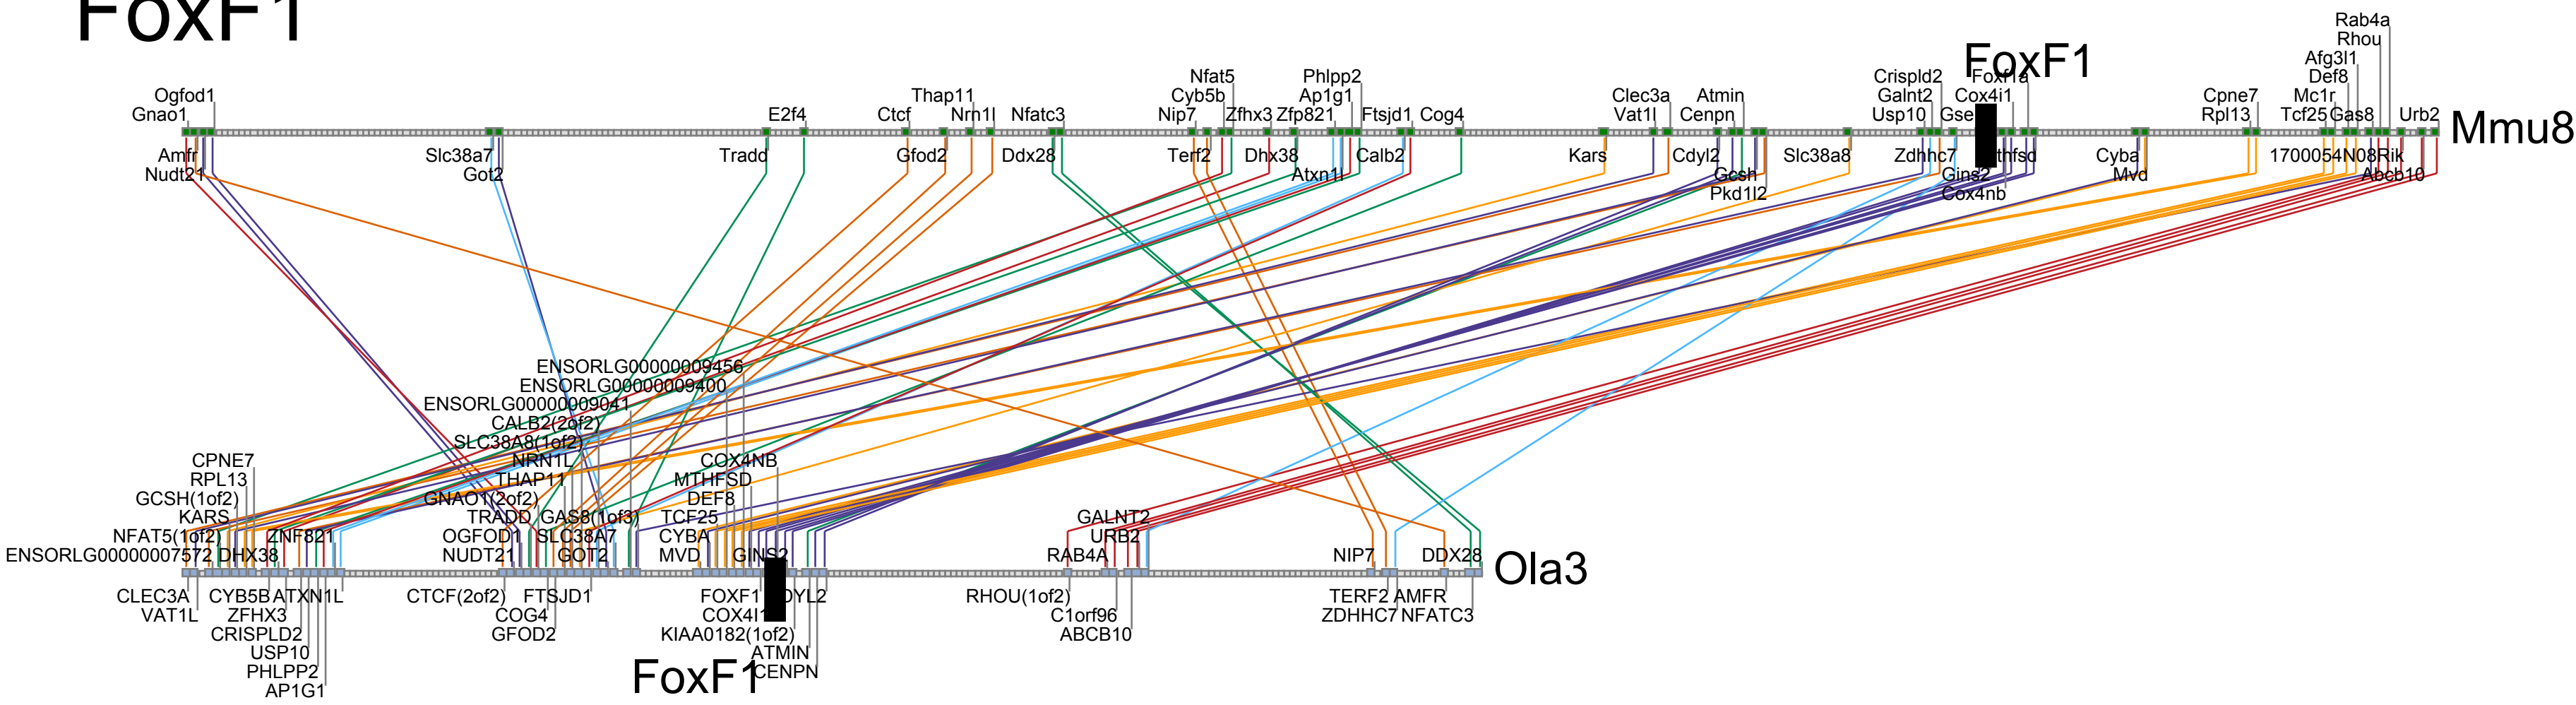

Foxl1

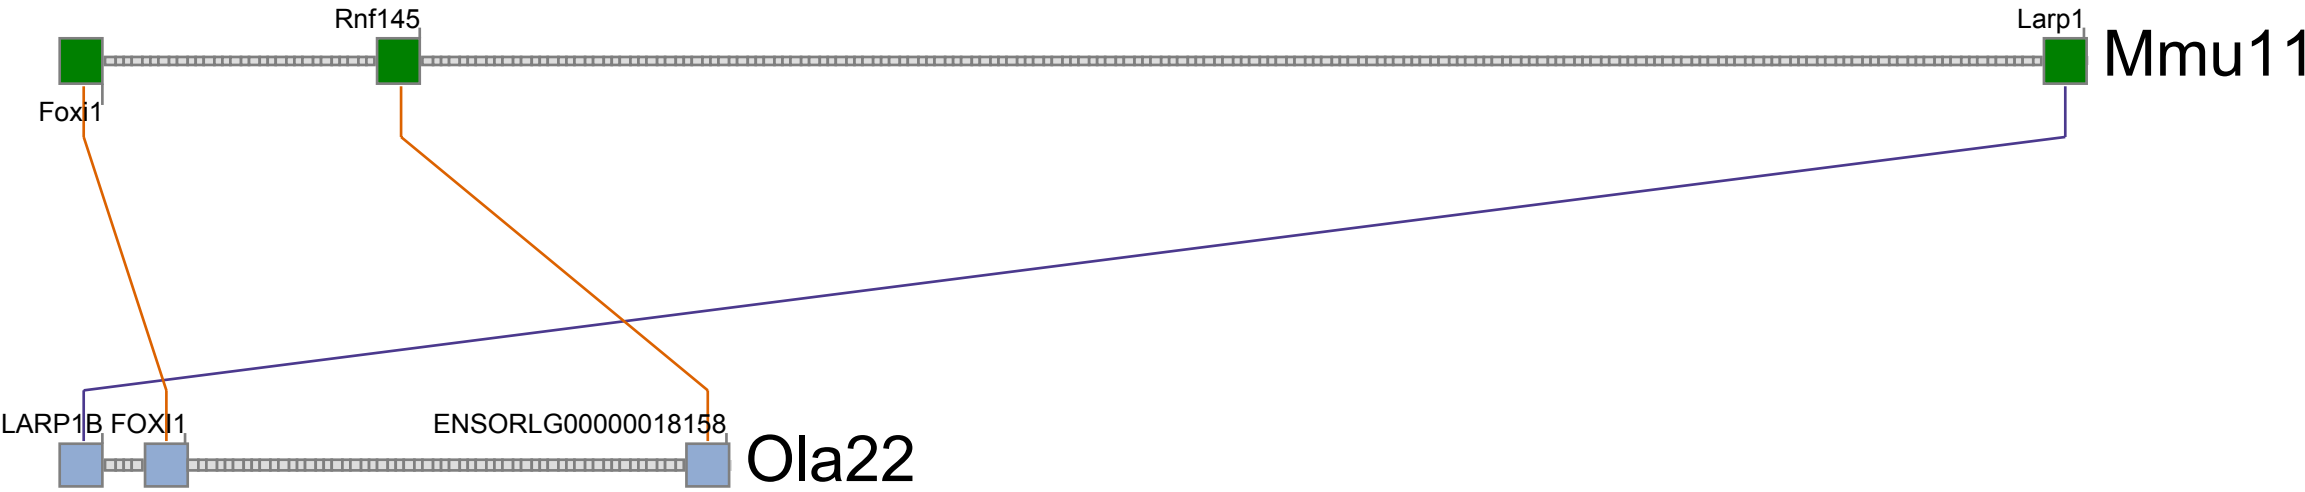

FoxK1

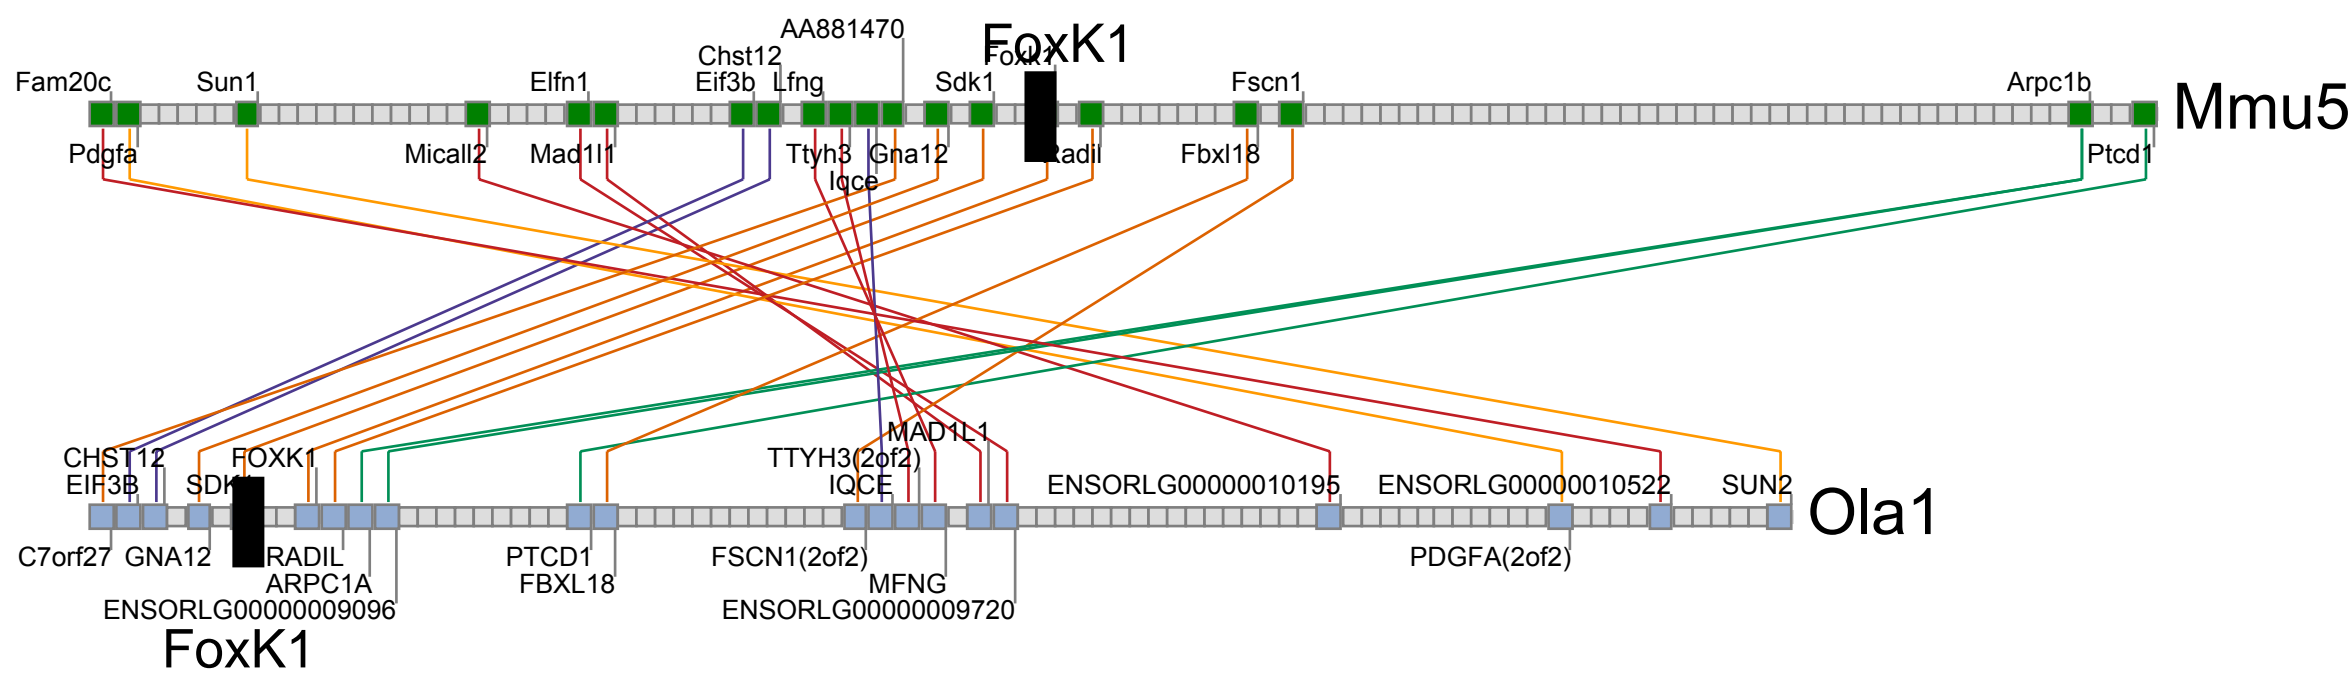

# FoxL2

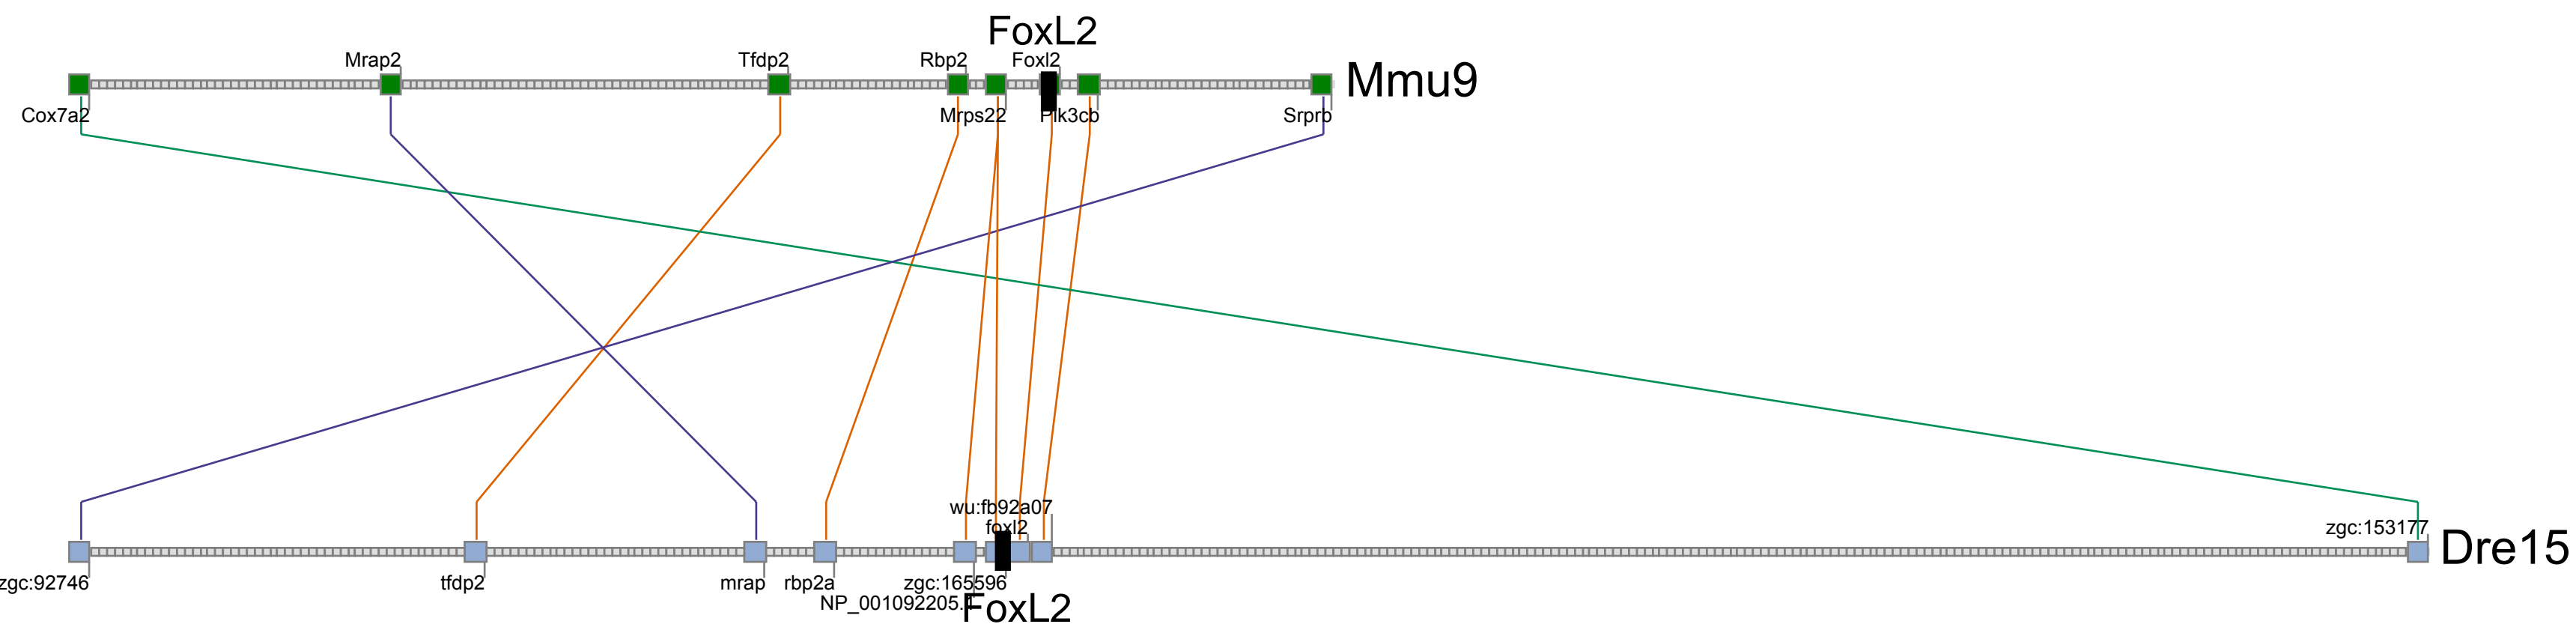

FoxM1

FoxM1

Mmu6

Ola23

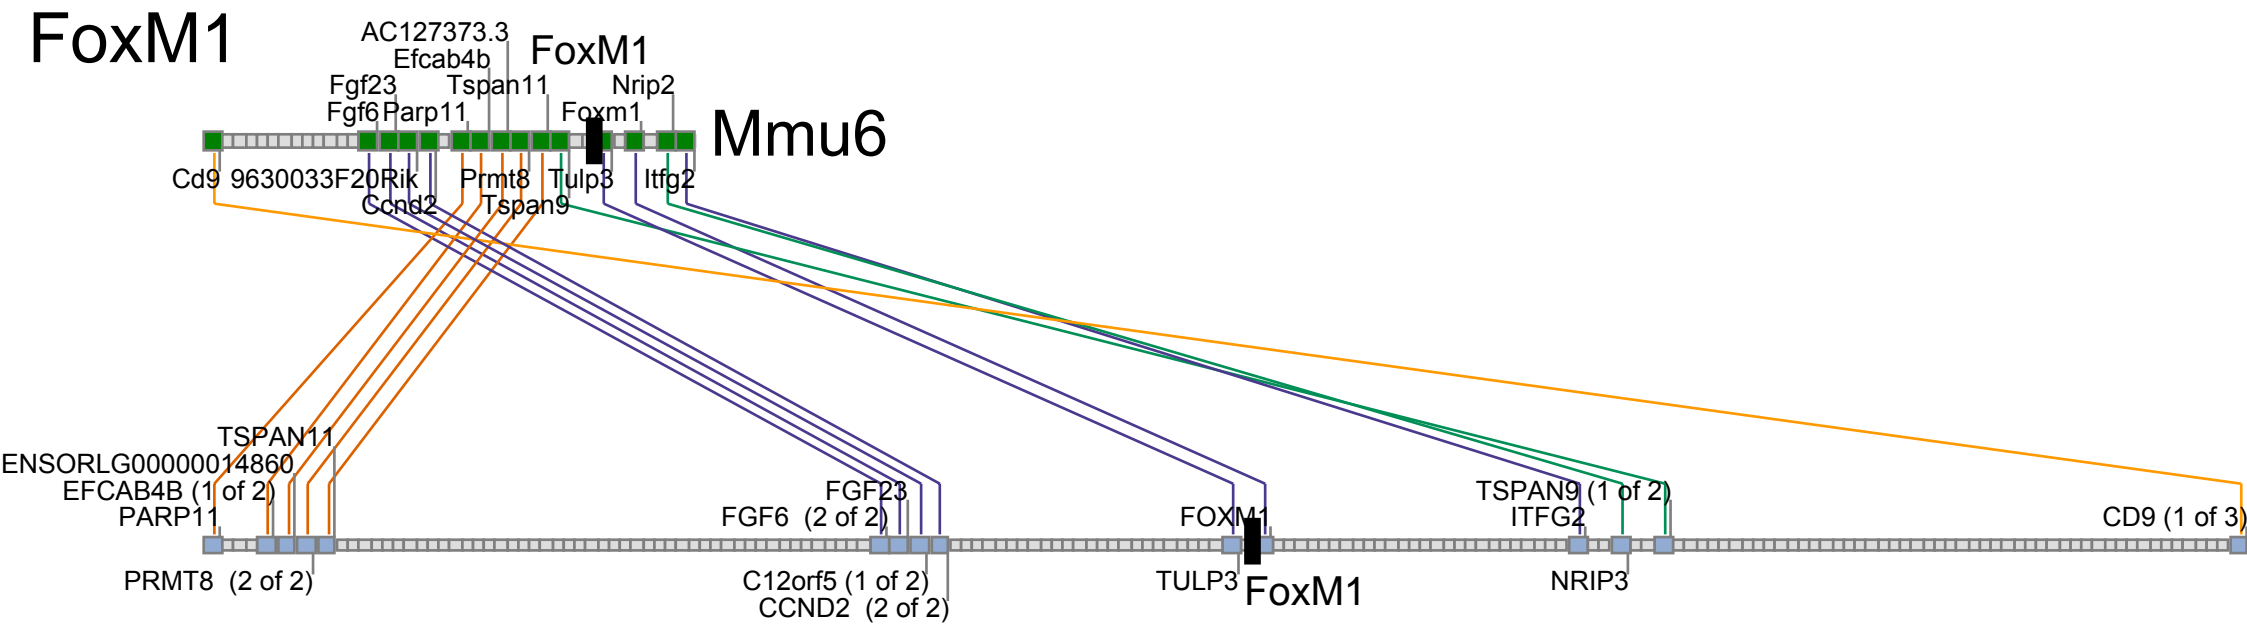

# FoxP1

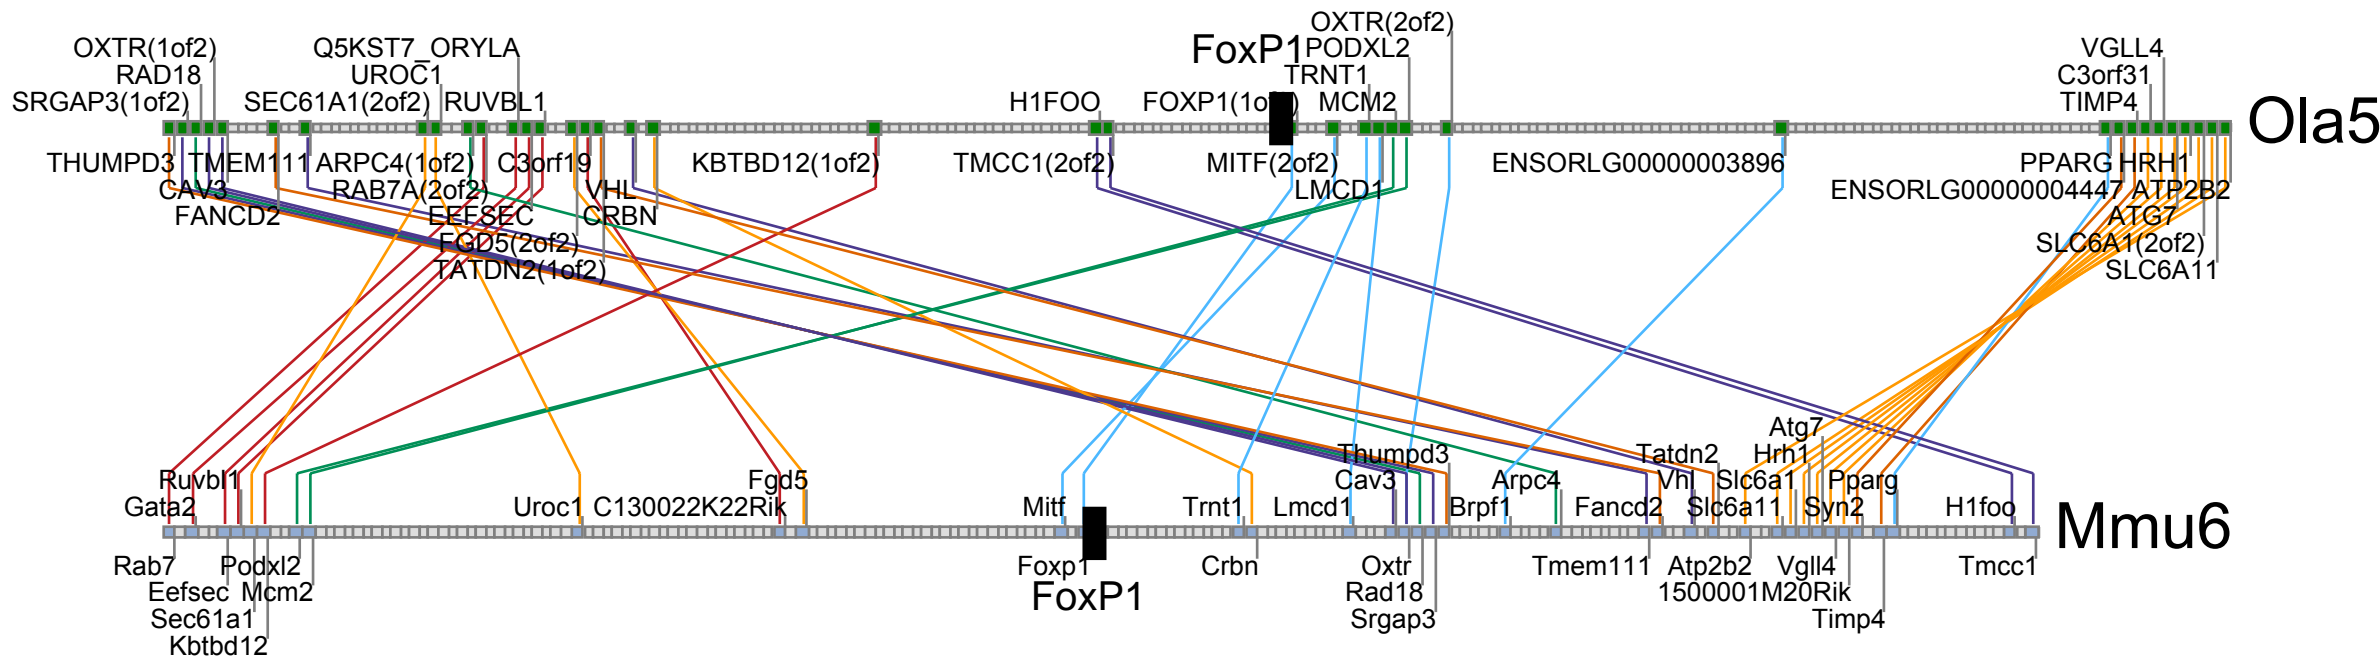

Supplement: Supplementary file 2 [file 1]
