# Supplementary material
Source: publisher figshare collection journal article supplement (https://karger.figshare.com/articles/dataset/_/4781053)
Supplement: Supplementary file 3 [file 1]

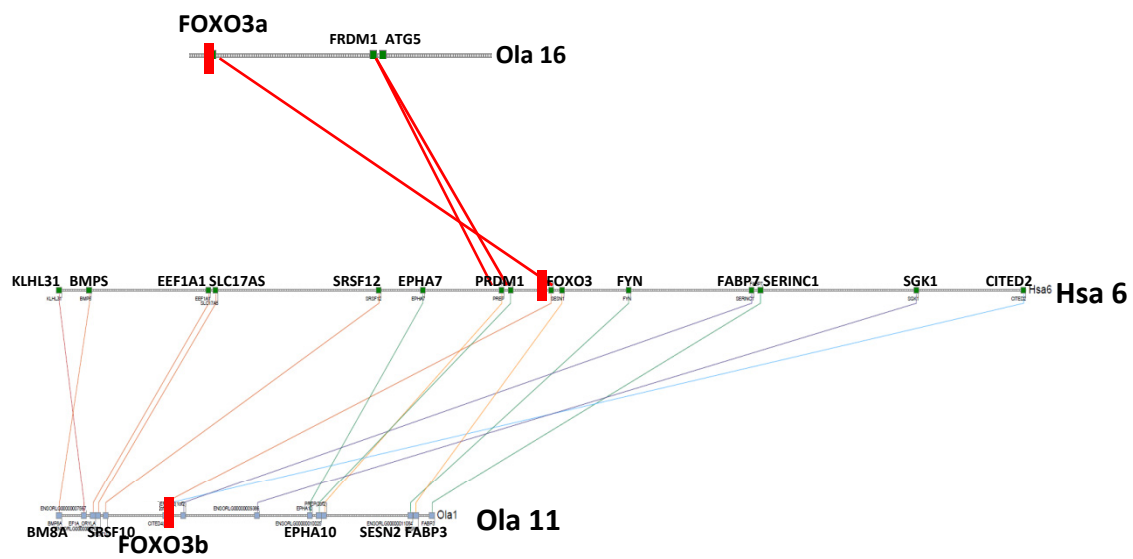

Supplemental Fig.7. Conserved syntenies for FOXO3 genes. The FOXO3 orthologous syntenic cluster showing syntenic conservation between Hsa6 and Ola11, Hsa6 and Ola16 (50-gene sliding window). The orthologs location was marked by black bar.
