# Supplementary material
Source: publisher figshare collection journal article supplement (https://karger.figshare.com/articles/dataset/_/4781053)
Supplement: Supplementary file 5 [file 1]

**A**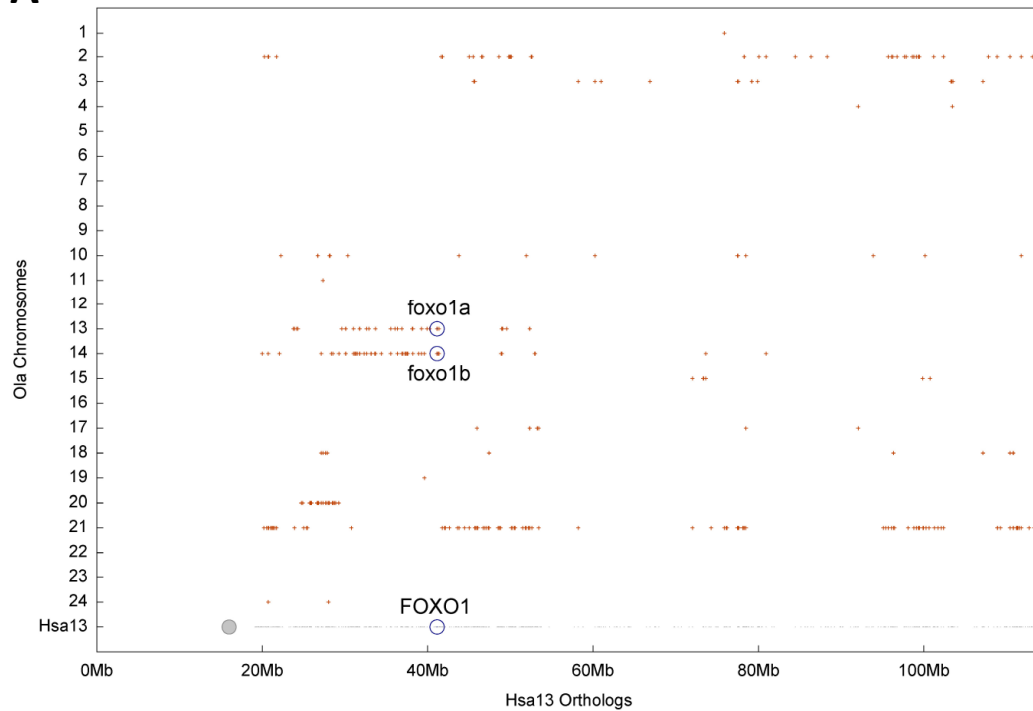**B**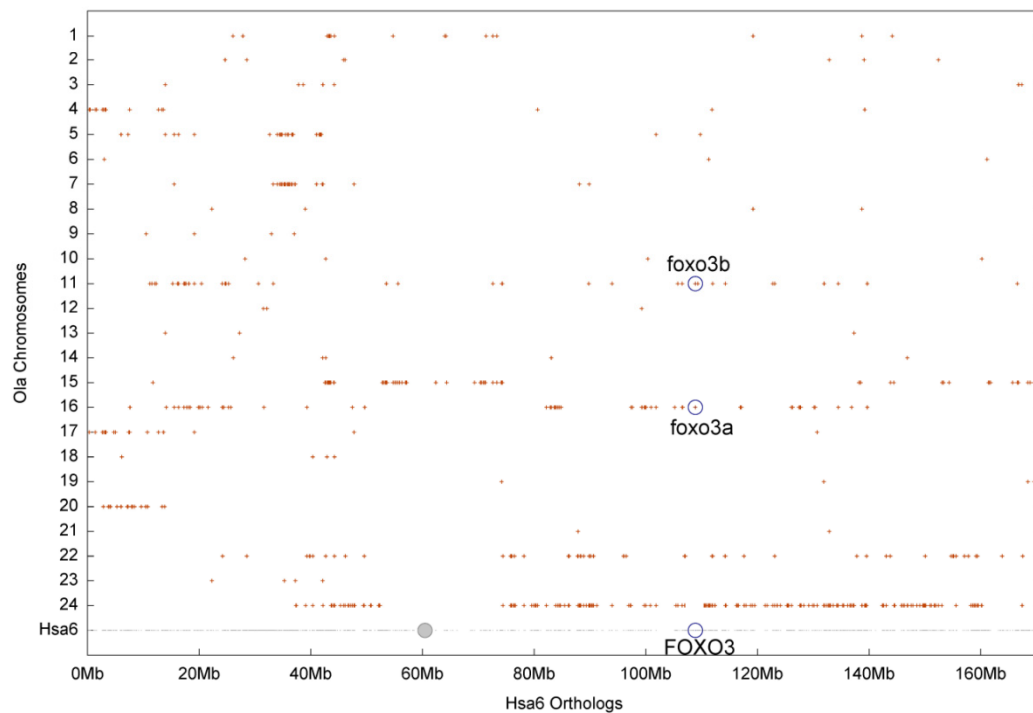

Supplemental Fig.6. Conserved synteny in *FOXO1/3* evolution. (A) Dotplot showing the *Oryzias latipes* (Ola) orthologs of Hsa13 genes. Medaka orthologs of Hsa13 genes are plotted vertically above the corresponding brown dot on their respective Ola chromosome. The long arm of Hsa13 shows strong orthology with Ola13 and Ola14. the circle point indicate the orthology gene in human and medaka chromosome respectively. (B) Dotplot showing the *Oryzias latipes* (Ola) orthologs of Hsa6 genes. The *FOXO3* located in long arm of Hsa6 shows orthology with *foxo3a* and *foxo3b* located in Ola11 and Ola16 respectively.
