# Supplementary material
Source: publisher figshare collection journal article supplement (https://karger.figshare.com/articles/dataset/_/4781053)
Supplement: Supplementary file 6 [file 1]

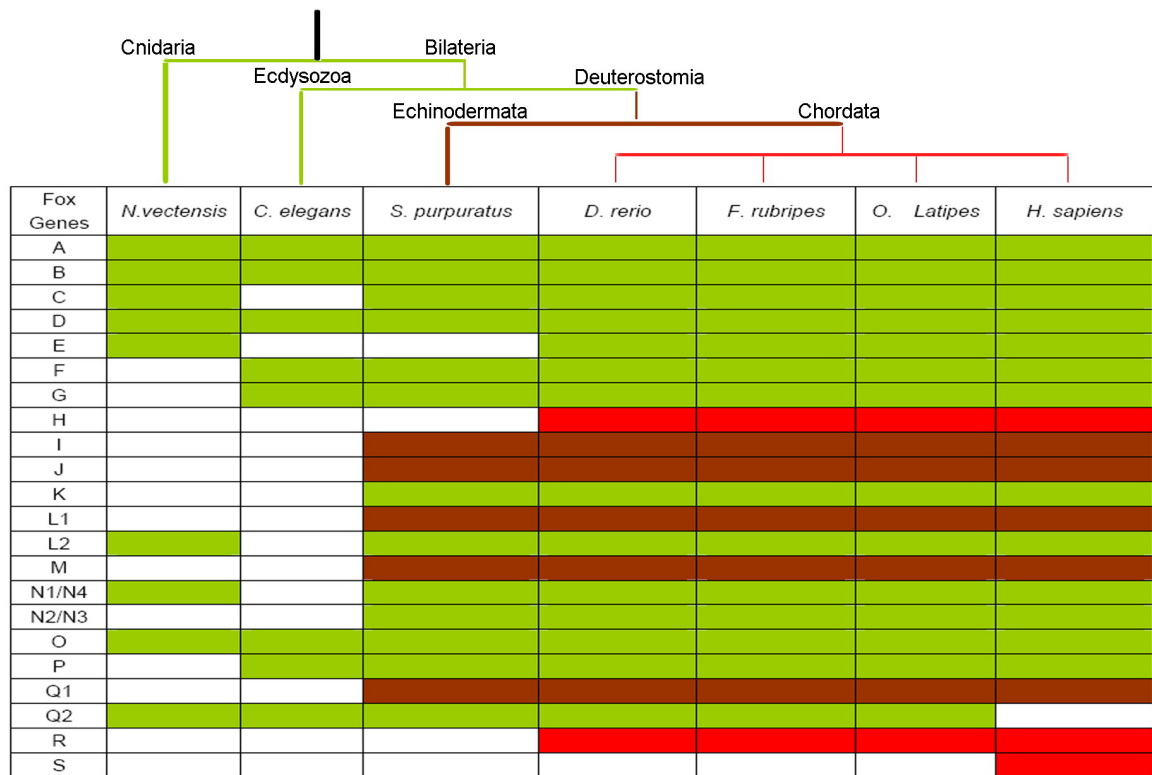

Supplemental Fig.3. Fox gene distribution by subclass in the different taxa. Orange, green, brown and red boxes indicate that a member of that subclass has been identified in this species
